# Supplementary material for: LncRNA RP11-551L14.4 suppresses breast cancer development by inhibiting the expression of miR-4472
Source: PeerJ. 2022 Dec 6;10:e14482. doi: 10.7717/peerj.14482 (PMC9745927; doi:10.7717/peerj.14482)
Supplement: Supplemental Information 2 [file peerj-10-14482-s002.xlsx]

## Sheet: Sheet1
				RP11-551L14.4 expression				RP11-551L14.4 expression
				adjacent tissues	breast cancer tissues			MCF-10A	MDA-MB-453	MCF7	BT474	T47D	ZR-75-1
				1.28576	1.78416			0.88148	0.6336	0.4747	0.171814	0.238612	0.6853
				3.10679	0.37656			1.17936	0.595635	0.576516	0.14098	0.215867	0.6782
				5.00688	4.53035			1.00975	0.769646	0.360536	0.0704742	0.313977	0.8431
				3.19463	2.2217			0.952638	0.42052	0.580699	0.266601	0.3278	0.79054
				4.27891	3.75984
				2.6061	1.57111
				5.02774	4.27508
				6.69066	1.92137			T47D
				4.32063	2.86535			Control				RP11-551L14.4 overexpression
				6.24542	1.28643		G1	59.4138	57.1686	52.8648	40.1305	64.8166	68.7025	70.732	79.4674
				1.89913	0.558289		s	26.6194	27.4305	30.5911	42.6092	24.4429	21.756	21.1318	19.9365
				4.22772	0.743282		G2	13.9668	15.4009	16.5441	17.2604	10.7405	9.54148	8.13623	0.596081
				8.76231	5.38721
				3.24318	2.62642
				7.69594	1.64203			BT474
				3.50718	2.82419			Control				RP11-551L14.4 overexpression
				5.8606	1.25426		G1	52.4535	51.9377	39	36.2701	57.363	59.6334	66.9981	71.0148
				10.2876	0.930088		s	26.3625	30.615	37.7502	45.3935	26.0619	25.8818	23.0414	20.2291
				6.02005	4.32861		G2	21.1841	17.4473	23.2498	18.3364	16.5752	14.4848	9.96049	8.75609
				10.0816	1.00791
				3.17324	0.948875
				5.3138	5.56811			T47D
				6.29608	0.336374			RP11-551L14.4 overexpression				RP11-551L14.4 + miR-4472
				4.13521	3.41702		G1	65.0505	67.8928	70.4665	80.3496	57.7339	57.6107	48.0128	45.8859
				5.5191	4.58896		s	19.1867	20.6489	17.3977	15.041	24.9359	22.6377	29.9847	37.4467
				2.58469	1.54726		G2	15.7629	11.4583	12.1357	4.60943	17.3302	19.7516	22.0026	16.6674
				3.98739	0.586901
				7.93964	1.90547			BT474
				5.33408	2.43082			RP11-551L14.4 overexpression				RP11-551L14.4 + miR-4472
				7.6871	2.67766		G1	69.7597	63.7251	63.1884	59.0979	24.1205	34.2063	36.1102	46.4293
				2.35511	0.456746		s	16.7141	21.5108	27.1521	28.502	42.0199	45.7407	37.8091	36.661
				3.50735	2.54299		G2	13.5262	14.7641	9.65949	12.4001	33.8595	20.053	26.0808	16.9097
				2.42861	1.65777
				4.595	0.98598
				2.45288	1.71146											the number of colony
				3.12153	0.954098												Control				RP11-551L14.4 overexpression
																T47D	178.274	101.014	135.282	115.176	31.136	21.3781	57.6954	27.9703
																BT474	122.025	131.462	111.834	168.984	70.1226	59.1195	37.2654	57.2953
								T47D									RP11-551L14.4 overexpression				RP11-551L14.4 + miR-4472
								Control			RP11-551L14.4 overexpression					T47D	22.24	56.207	11.291	63.184	139.68	125.87	88.253	124.977
							CCK-8	0.272363	0.238724	0.267523	0.2135	0.226412	0.309601			BT474	43.186	54.909	33.595	29.177	163.73	114.45	122.7	139.37
								0.66305	0.864365	0.785855	0.426155	0.530073	0.535047
								1.59406	1.53696	1.3009	1.09866	0.869518	0.836716
								1.99512	1.75965	1.71158	0.998297	1.24508	0.970013
								1.9002	2.01593	1.74901	0.975027	1.287	1.10535				Relative luciferase activity
																	0.929805	0.293	1.02954	1.05482
								BT474									0.957272	0.59	0.934327	0.81169
								Control			RP11-551L14.4 overexpression						0.843816	0.171	0.916369	0.835667
							CCK-8	0.188113	0.296846	0.18477	0.265245	0.222838	0.213832				1.33145	0.356	1.13445	1.39765
								0.763196	0.681171	0.687563	0.566423	0.427292	0.388481
								0.931634	1.11738	1.07522	0.880116	0.759785	0.706954
								1.37733	1.59309	1.32411	0.908081	1.04189	1.20797
								1.75936	1.69026	1.49816	1.04109	1.32395	1.30496
																	RP11-551L14.4 overexpression
																	T47D			BT474
																	1.42573	15.7008		0.890058	10.3282
								T47D									0.881275	12.9781		1.35047	7.29167
								RP11-551L14.4 overexpression			RP11-551L14.4 + miR-4472						0.958072	9.8904		0.454629	9.26262
							CCK-8	0.296121	0.29057	0.275411	0.264737	0.271142	0.281603				0.830719	7.5505		1.82995	11.2477
								0.405718	0.368069	0.280666	0.592957	0.497279	0.500995
								0.637289	0.501422	0.668033	1.01654	0.910955	0.85584
								1.09358	1.08354	1.24874	1.75224	1.53706	1.76215
								1.21938	1.39805	1.10267	1.72275	1.8335	2.05854				miR-4472 expression
																	T47D			BT474
																	0.722465	0.180629		0.95033	0.369981
																	1.08598	0.1212		1.0677	0.248674
								BT474									1.00486	0.221684		0.95033	0.268796
								RP11-551L14.4 overexpression			RP11-551L14.4 + miR-4472						1.26839	0.285884		1.03706	0.324429
							CCK-8	0.263299	0.274525	0.239699	0.24376	0.313561	0.286134
								0.46371	0.389489	0.3381	0.824	0.712828	0.606509
								0.854957	0.958159	0.732122	1.55706	1.43204	1.18372				RGMA mRNA expression
								1.32582	1.04942	1.28295	1.6225	1.71587	1.90567				T47D			BT474
								1.39158	1.26459	1.1641	1.97313	1.75602	1.80559				1.01713	5.57688		0.923062	5.9558
																	1.27147	3.51605		1.14274	4.9062
																	0.854114	3.61329		1.03706	6.0019
																	0.90532	4.4277		0.914148	6.2355
										（lncRNA+miR-4472）miR-4472 expression
										T47D			BT474
										0.729168	12.1416		1.55521	11.1618
										0.564115	11.9435		0.689291	9.20461
										1.25584	13.3876		0.479047	8.34317
										1.4729	16.2249		1.64946	6.86408
